# Supplementary material for: Personalized 3-Gene Panel for Prostate Cancer Target Therapy
Source: MDPI journal article supplement (doi:10.3390/cimb44010027), 2022-01-15
Supplement: s1 [file s1]

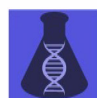

Article

# Personalized 3-gene panel for prostate cancer target therapy

Sanda Iacobas <sup>1</sup> and Dumitru Andrei Iacobas <sup>2,\*</sup>

## Supplementary Material

| Gene     | Description                                                  | REV-P  | REV-Q  | REV-M  | REV-Z  |
|----------|--------------------------------------------------------------|--------|--------|--------|--------|
| LINC0029 | long intergenic non-protein coding RNA 294                   | 186.26 | 167.79 | 9.72   | 9.11   |
| RNF180   | ring finger protein 180                                      | 176.24 | 88.31  | 13.00  | 24.39  |
| ZNF514   | zinc finger protein 514                                      | 173.86 | 104.05 | 18.43  | 9.59   |
| SCGB1A1  | secretoglobin, family 1A, member 1                           | 117.24 | 192.39 | 30.93  | 79.71  |
| ACTA1    | actin, alpha 1, skeletal muscle                              | 128.46 | 188.64 | 16.90  | 100.97 |
| TCAP     | titin-cap                                                    | 41.99  | 185.20 | 12.58  | 118.09 |
| OAZ2     | ornithine decarboxylase antizyme 2                           | 19.57  | 12.15  | 182.91 | 131.26 |
| ZNF16    | zinc finger protein 16                                       | 11.25  | 10.56  | 164.26 | 89.80  |
| UBE2I    | ubiquitin-conjugating enzyme E2I                             | 22.29  | 34.84  | 160.31 | 195.73 |
| UBE2I    | ubiquitin-conjugating enzyme E2I                             | 22.29  | 34.84  | 160.31 | 195.73 |
| MBD6     | methyl-CpG binding domain protein 6                          | 16.58  | 27.71  | 93.02  | 162.48 |
| OSCP1    | organic solute carrier partner 1                             | 3.82   | 11.27  | 54.45  | 140.84 |
| Gene     | Description                                                  | REV-A  | REV-B  | REV-C  | REV-N  |
| USP31    | ubiquitin specific peptidase 31                              | 188.14 | 73.66  | 11.44  | 16.41  |
| SLC25A47 | solute carrier family 25, member 47                          | 184.85 | 128.52 | 29.57  | 79.31  |
| COL11A2  | collagen, type XI, alpha 2                                   | 183.19 | 109.21 | 22.43  | 20.50  |
| NPY      | neuropeptide Y                                               | 99.58  | 131.89 | 80.91  | 45.59  |
| HIST2H3A | histone cluster 2, H3a                                       | 72.93  | 146.86 | 58.95  | 17.16  |
| MAFK     | v-maf avian musculoaponeurotic fibrosarcoma oncogene homolog | 10.25  | 188.55 | 11.06  | 7.19   |
| PI16     | peptidase inhibitor 16                                       | 95.35  | 38.48  | 159.77 | 6.93   |
| SCX      | scleraxis basic helix-loop-helix transcription factor        | 40.88  | 31.76  | 189.57 | 10.23  |
| ZYX      | zyxin                                                        | 24.33  | 13.72  | 192.35 | 30.97  |
| TMCC2    | transmembrane and coiled-coil domain family 2                | 105.67 | 72.80  | 12.67  | 132.20 |
| TTC13    | tetratricopeptide repeat domain 13                           | 18.03  | 40.03  | 18.09  | 132.80 |
| UXT      | ubiquitously-expressed, prefoldin-like chaperone             | 117.50 | 73.66  | 8.84   | 133.35 |

**Table S1:** The 3 genes most variably expressed (high REV) across biological replicas in all profiled regions of the two patients. Note that, excepting *UBE2I*, common for node “M” and normal tissue “Z”, there is no overlap of the most variably expressed 3 genes in each region.
